# Supplementary material
Source: PubMed Central journal article supplement (PMC6182240)
Supplement: zjb999094893s1.pdf [file zjb999094893s1.pdf]

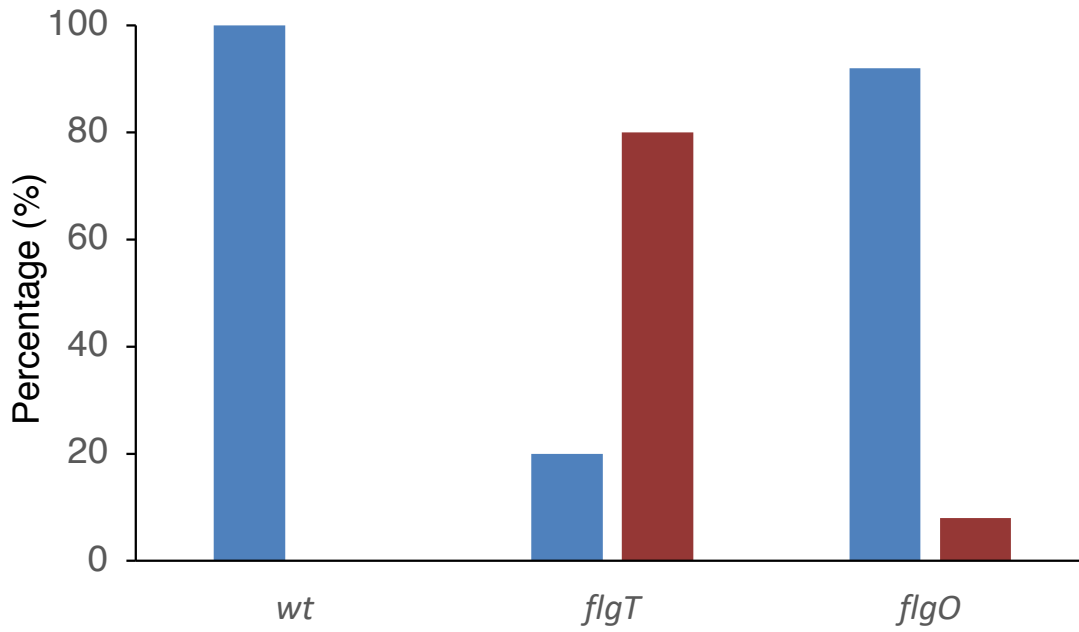

442

443 Fig. S1. Percentage of periplasmic flagella (red) and polar flagella (blue) found in wild type,

444  $\Delta flgT$  and  $\Delta flgO$  cells.

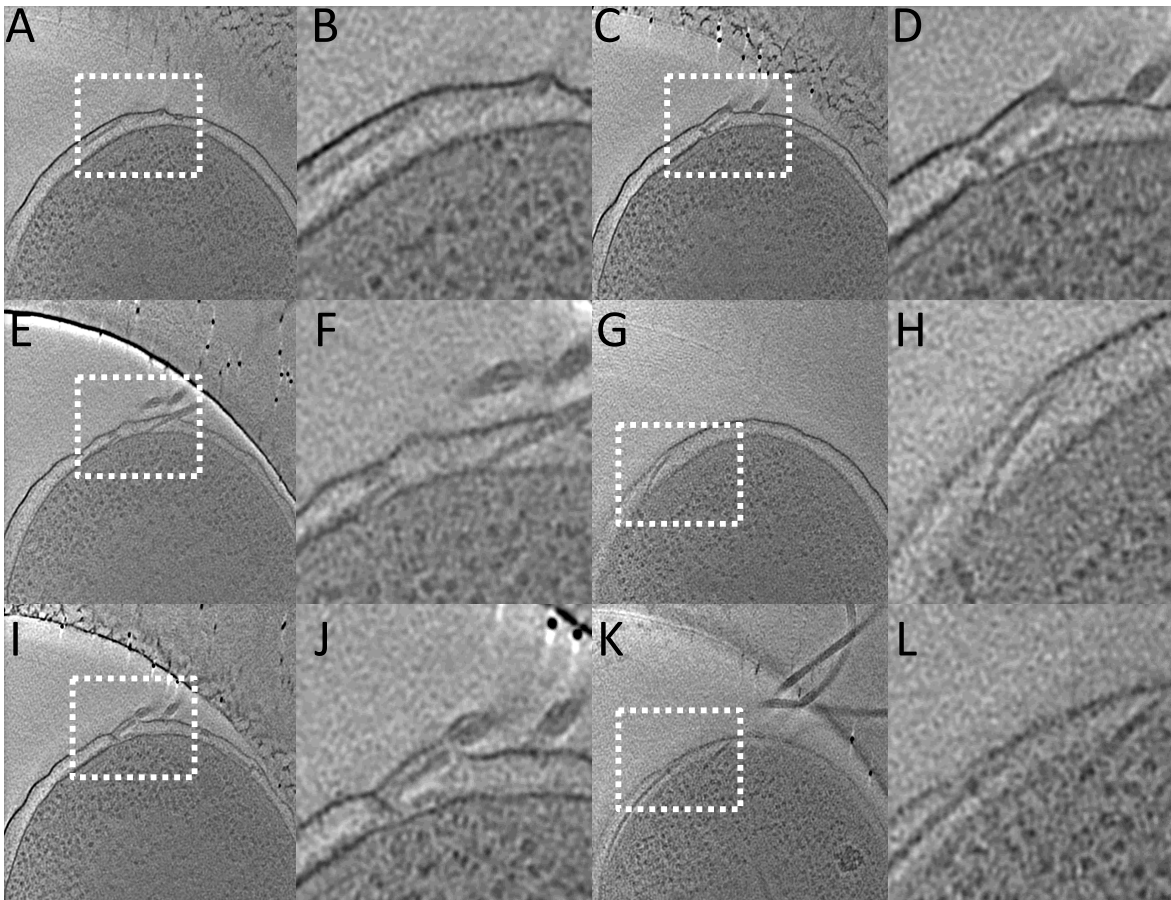

445

446 Fig. S2. Gallery of periplasmic flagella found in the  $\Delta flgO$  cells.
